# Supplementary material for: Psychological stress-induced systemic corticosterone directly sabotages intestinal stem cells and exacerbates colitis
Source: Springer Nature journal article supplement (doi:10.1038/s41421-025-00796-y), 2025-05-13
Supplement: MOESM1 [file 41421_2025_796_MOESM1_ESM.pdf]

**Supplementary Fig. S1**

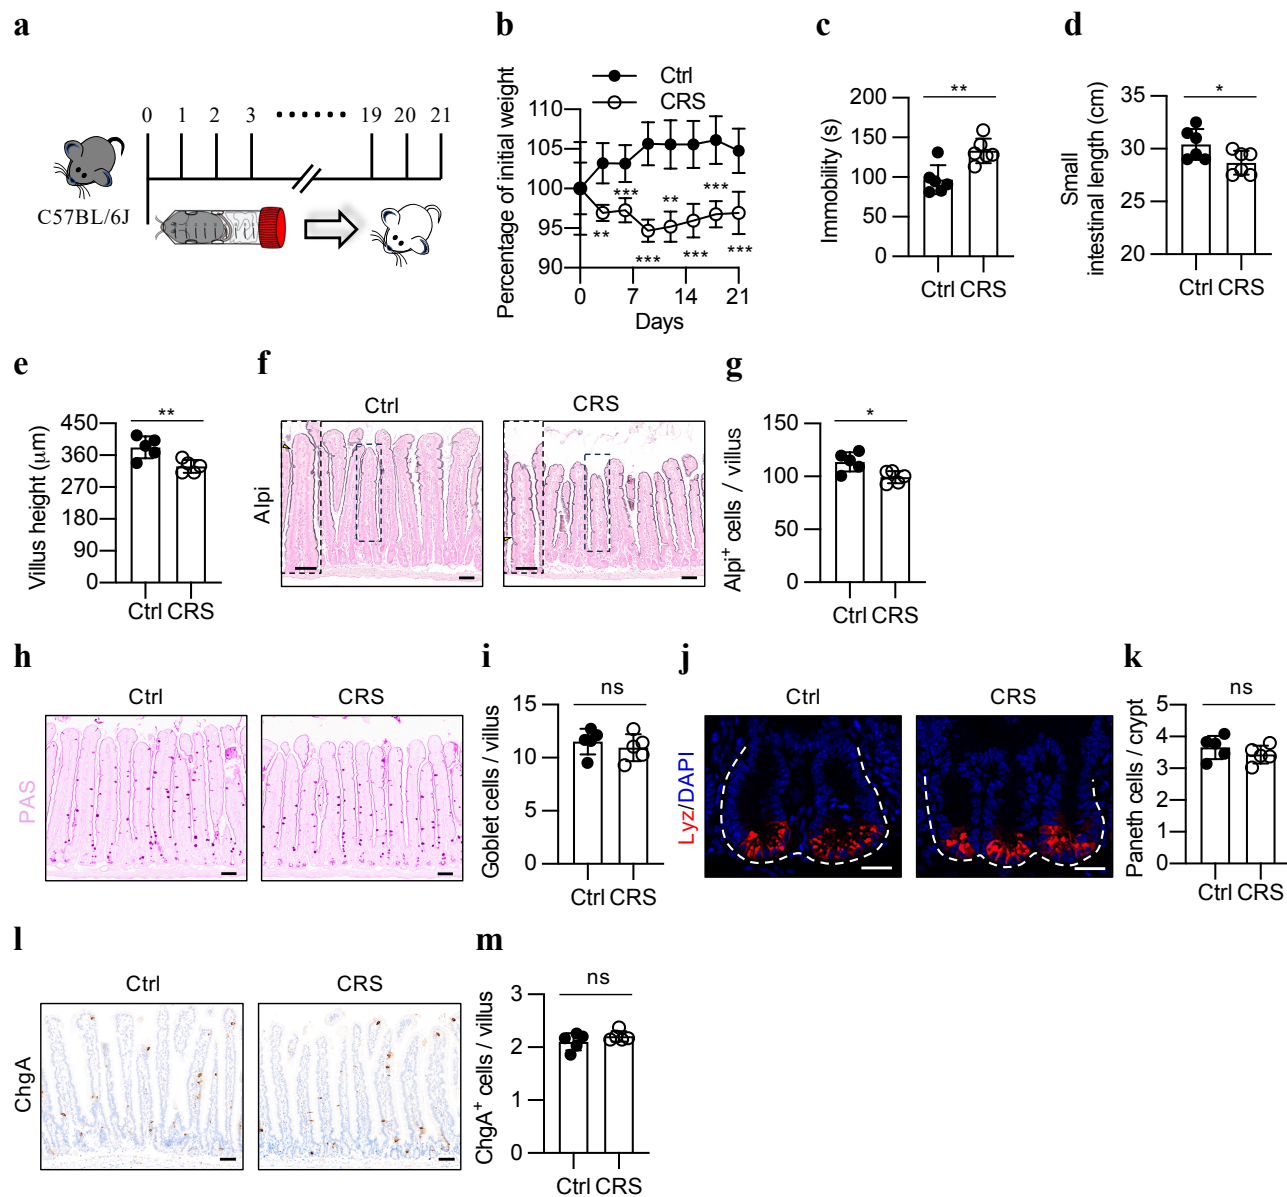

**Supplementary Fig. S1 Chronic stress impacts the small intestinal epithelium.**

**a** Schematic of the chronic restraint stress (CRS) mouse model. C57BL/6J mice were subjected to CRS treatment for 3 hours per day over 3 weeks. Control mice were deprived of food and water for the same duration without restraint stress. **b** Change in body weight of control (Ctrl) and CRS-treated mice (n=6) during the CRS treatment period. The body weight was monitored every three days and expressed as a percentage of the initial body weight. **c** Immobility time of the Ctrl and CRS-treated mice in the forced swimming test (FST) (n=6). **d** Small intestine length of Ctrl and CRS-treated mice (n=6). **e** Quantification of villus height in the jejunum of Ctrl and CRS-treated mice (n=5). **f, g** Alpi staining (**f**) and quantification of enterocytes per villus (**g**) in the jejunum of Ctrl and CRS-treated mice (n=5). Yellow arrows pointing to the Alpi-negative epithelial cells. Scale bar: 50  $\mu$ m. **h, i** PAS staining (**h**) and quantification of mucinous goblet cells per villus (**i**) in the jejunum of Ctrl and CRS-treated mice (n=5). Scale bar: 50  $\mu$ m. **j, k** Lyz staining (**j**) and quantification of Lyz<sup>+</sup> Paneth cells per crypt (**k**) in the jejunum of Ctrl and CRS-treated mice (n=5). Scale bar: 20  $\mu$ m. **l, m** ChgA staining (**l**) and quantification of ChgA<sup>+</sup> enteroendocrine cells per villus (**m**) in the jejunum of Ctrl and CRS-treated mice (n=5). Scale bar: 50  $\mu$ m. The data are presented as the mean  $\pm$  SD. The statistical analysis was performed by an unpaired two-tailed Student's *t* test for normally distributed data or the Mann–Whitney test for non-normally distributed data. ns,  $P \geq 0.05$ , \* $P < 0.05$ , \*\* $P < 0.01$ .

**Supplementary Fig. S2**

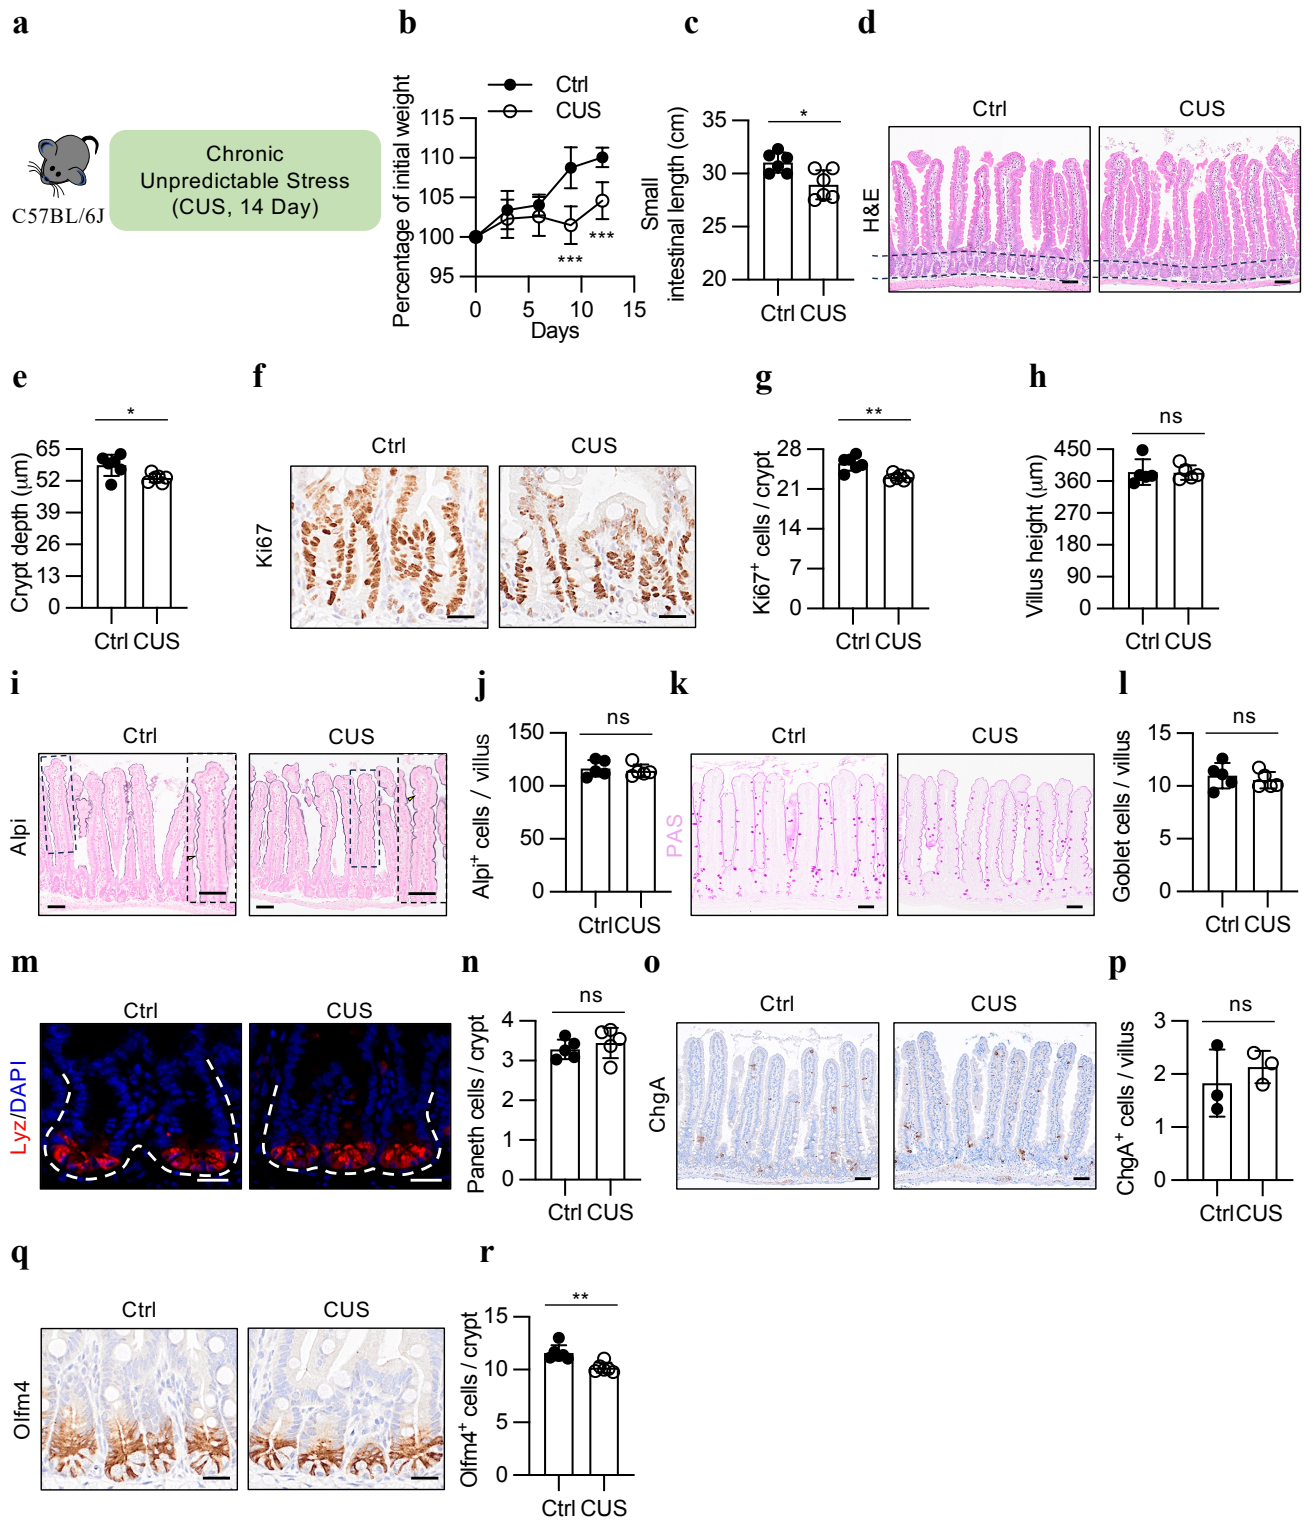

**Supplementary Fig. S2 CUS assays validated the detrimental effect of stress on ISCs.**

**a** Schematic of the chronic unpredictable stress (CUS) model in mice. C57BL/6J mice were subjected to CUS treatment daily for 2 weeks. Control mice were similarly deprived of food and water for the same duration without unpredictable stress. **b** Change in body weight of control (Ctrl) and CUS-treated mice (n=6) during the CUS treatment period. The body weight was monitored every three days and expressed as a percentage of the initial body weight. **c** Small intestine length of Ctrl and CUS-treated mice (n=6). **d, e** H&E staining (**d**) and quantification of crypt depth (**e**) in the jejunum of Ctrl and CUS-treated mice (n=6). Scale bar: 50  $\mu$ m. **f, g** Ki-67 staining (**f**) and quantification of Ki-67<sup>+</sup> cells per crypt (**g**) in the jejunum of Ctrl and CUS-treated mice (n=6). Scale bar: 20  $\mu$ m. **h** Quantification of villus height in the jejunum of Ctrl and CUS-treated mice (n=5). Scale bar: 50  $\mu$ m. **i, j** Representative Alpi staining (**i**) and quantification of Alpi<sup>+</sup> enterocytes per villus (**j**) in the jejunum of Ctrl and CUS-treated mice (n=5). Yellow arrows pointing to the Alpi-negative epithelial cells. Scale bar: 50  $\mu$ m. **k, l** PAS staining (**k**) and quantification of mucinous goblet cells per villus (**l**) in the jejunum of Ctrl and CUS-treated mice (n=5). Scale bar: 50  $\mu$ m. **m, n** Lyz staining (**m**) and quantification of Lyz<sup>+</sup> Paneth cells per crypt (**n**) in the jejunum of Ctrl and CUS-treated mice (n=5). Scale bar: 20  $\mu$ m. **o, p** ChgA staining (**o**) and quantification of ChgA<sup>+</sup> enteroendocrine cells per villus (**p**) in the jejunum of Ctrl and CUS-treated mice (n=3). Scale bar: 50  $\mu$ m. **q, r** Olfm4 staining (**q**) and quantification of Olfm4<sup>+</sup> cells per crypt (**r**) in the jejunum of Ctrl and CUS-treated mice (n=6). Scale bar: 20  $\mu$ m. The data



are presented as the mean  $\pm$  SD. The statistical analysis was performed by an unpaired two-tailed Student's  $t$  test for normally distributed data or the Mann–Whitney test for non-normally distributed data. ns,  $P \geq 0.05$ ,  $*P < 0.05$ ,  $**P < 0.01$ .

**Supplementary Fig. S3**

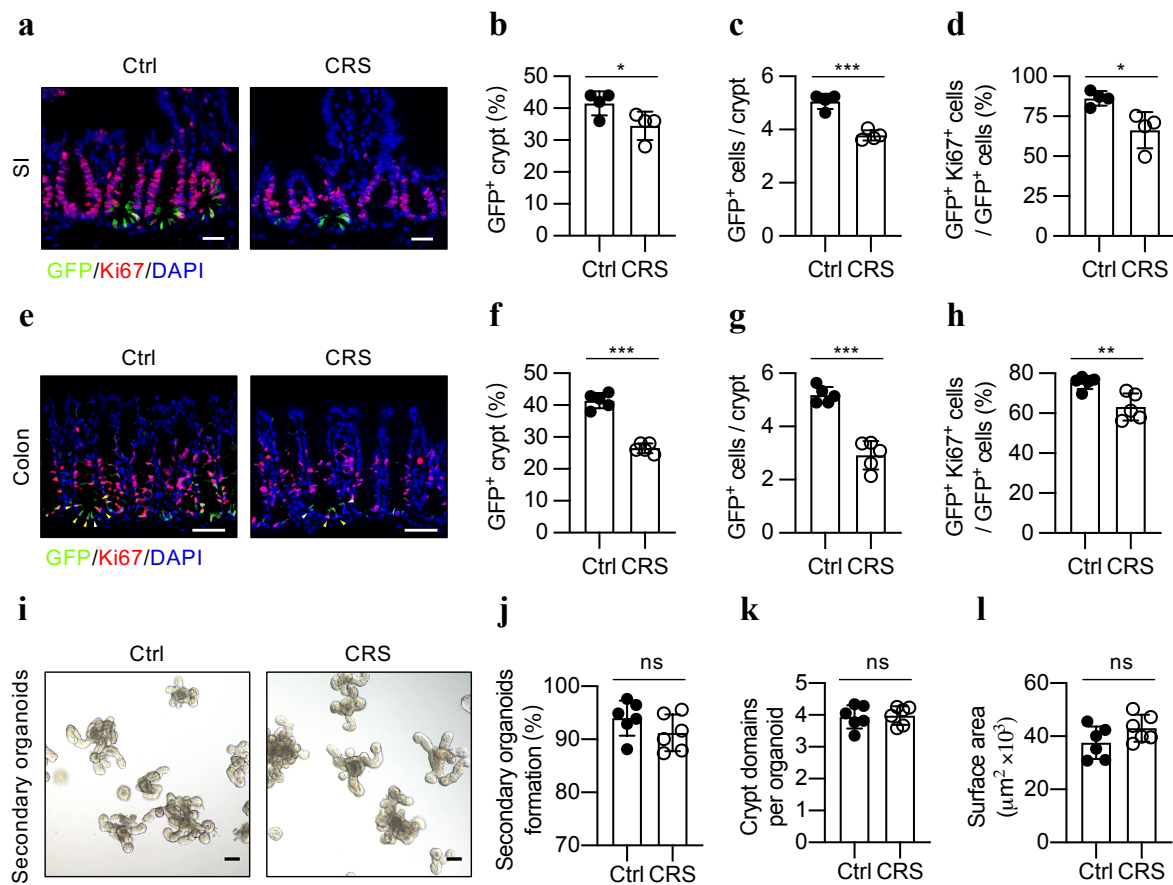

**Supplementary Fig. S3 Chronic stress leads to the reduction in the numbers and proliferative activity of colonic stem cells.**

**a**  $Lgr5^{+}$  stem cells were identified with anti-GFP and proliferative state was visualized by Ki-67 staining in the jejunum of control (Ctrl) and CRS-treated *Lgr5-EGFP-IRES-creERT2* mice. SI, small intestine. Scale bar: 20  $\mu$ m. **b-d** Quantification of percentage of GFP<sup>+</sup> crypt (**b**), GFP<sup>+</sup> cells per crypt (**c**), and the proportion of GFP<sup>+</sup> cells expressing Ki-67 (**d**) in the jejunum of Ctrl and CRS-treated *Lgr5-EGFP-IRES-creERT2* mice (n=4). **e**  $Lgr5^{+}$  stem cells were identified with anti-GFP and proliferative state was visualized by Ki-67 staining in the colon of Ctrl and CRS-treated *Lgr5-EGFP-IRES-creERT2* mice. Scale bar: 50  $\mu$ m. **f-h** Quantification of percentage of GFP<sup>+</sup> crypt (**f**), GFP<sup>+</sup> cells per crypt (**g**), and the proportion of GFP<sup>+</sup> cells expressing Ki-67 (**h**) in the colon of Ctrl and CRS-treated *Lgr5-EGFP-IRES-creERT2* mice (n=5). **i** Representative images of day 3 secondary organoids generated from dissociated crypt-derived primary organoids from small intestine of Ctrl and CRS-treated mice. Scale bar: 100  $\mu$ m. **j-l** Quantification of secondary organoid formation (**j**), bud number (**k**) and surface area (**l**) (n=6). The data are presented as the mean  $\pm$  SD. The statistical analysis was performed by an unpaired two-tailed Student's *t* test for normally distributed data or the Mann–Whitney test for non-normally distributed data. ns,  $P \geq 0.05$ , \* $P < 0.05$ , \*\* $P < 0.01$ , \*\*\* $P < 0.001$ .

**Supplementary Fig. S4**

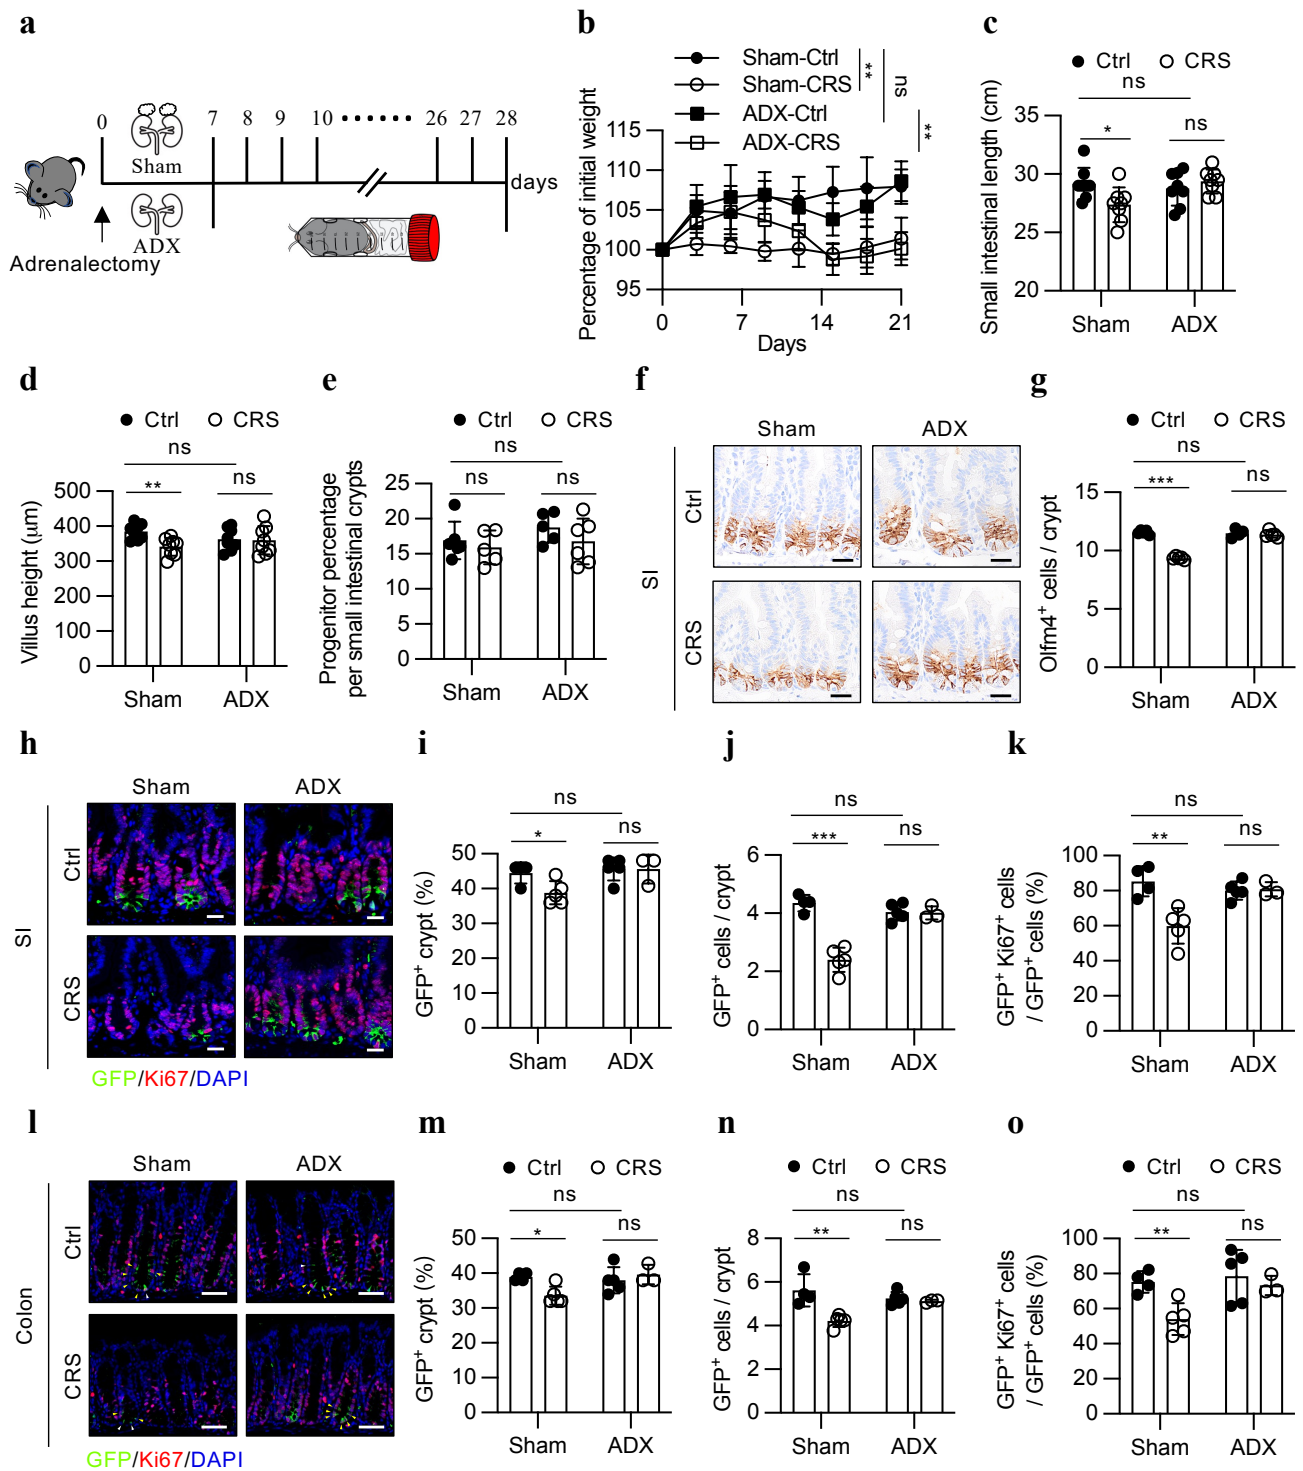

**Supplementary Fig. S4 Adrenalectomy counteracts the effect of stress on the intestinal epithelium.**

**a** Schematic of the ADX-CRS paradigm. One week after the operation, a portion of the sham-operated (Sham) mice and the adrenalectomized (ADX) mice were subjected to CRS treatment for 3 weeks. **b** Change in body weight of Sham+Ctrl (n=5), Sham+CRS (n=6), ADX+Ctrl (n=4), and ADX+CRS (n=5) mice during CRS treatment. Body weight was monitored every three days and expressed as a percentage of the initial body weight. **c** Small intestine length of Sham+Ctrl, Sham+CRS, ADX+Ctrl, and ADX+CRS (n=8) mice. **d** Quantification of villus height in the jejunum of Sham+Ctrl, Sham+CRS, ADX+Ctrl, and ADX+CRS (n=8) mice. **e** Quantification of the percentage of progenitor cells (*Lgr5*-EGFP<sup>Low</sup>) in the small intestine of Sham+Ctrl (n=6), Sham+CRS (n=5), ADX+Ctrl (n=5) and ADX+CRS *Lgr5*-EGFP-IREs-creERT2 mice (n=6) by flow cytometric analysis. **f, g** *Olfm4* staining (**f**) and quantification of *Olfm4*<sup>+</sup> cells per crypt (**g**) in the jejunum of Sham+Ctrl (n=5), Sham+CRS (n=5), ADX+Ctrl (n=4) and ADX+CRS (n=5) mice. Scale bar: 20  $\mu$ m. **h** *Lgr5*<sup>+</sup> stem cells were identified with anti-GFP, and proliferative state was visualized by Ki-67 staining in the jejunum of Sham+Ctrl, Sham+CRS, ADX+Ctrl and ADX+CRS *Lgr5*-EGFP-IREs-creERT2 mice. SI, small intestine. Scale bar: 20  $\mu$ m. **i-k** Quantification of percentage of GFP<sup>+</sup> crypt (**i**), GFP<sup>+</sup> cells per crypt (**j**), and the proportion of GFP<sup>+</sup> cells expressing Ki-67 (**k**) in the jejunum of Sham+Ctrl (n=4), Sham+CRS (n=5), ADX+Ctrl (n=5) and ADX+CRS (n=3) *Lgr5*-EGFP-IREs-creERT2 mice. **l** *Lgr5*<sup>+</sup> stem cells were identified using anti-GFP, and proliferative state was visualized by Ki-67 staining in the colon of Sham+Ctrl,

Sham+CRS, ADX+Ctrl and ADX+CRS *Lgr5-EGFP-IRES-creERT2* mice. Scale bar: 50  $\mu\text{m}$ . **m-o** Quantification of percentage of GFP<sup>+</sup> crypt (**m**), GFP<sup>+</sup> cells per crypt (**n**), and the proportion of GFP<sup>+</sup> cells expressing Ki-67 (**o**) in the colon of Sham+Ctrl (n=4), Sham+CRS (n=5), ADX+Ctrl (n=5) and ADX+CRS (n=3) *Lgr5-EGFP-IRES-creERT2* mice. The data are presented as the mean  $\pm$  SD. The statistical analysis was performed by an unpaired two-tailed Student's *t* test for normally distributed data or the Mann–Whitney test for non-normally distributed data. ns,  $P \geq 0.05$ , \* $P < 0.05$ , \*\* $P < 0.01$ , \*\*\* $P < 0.001$ .

## Supplementary Fig. S5

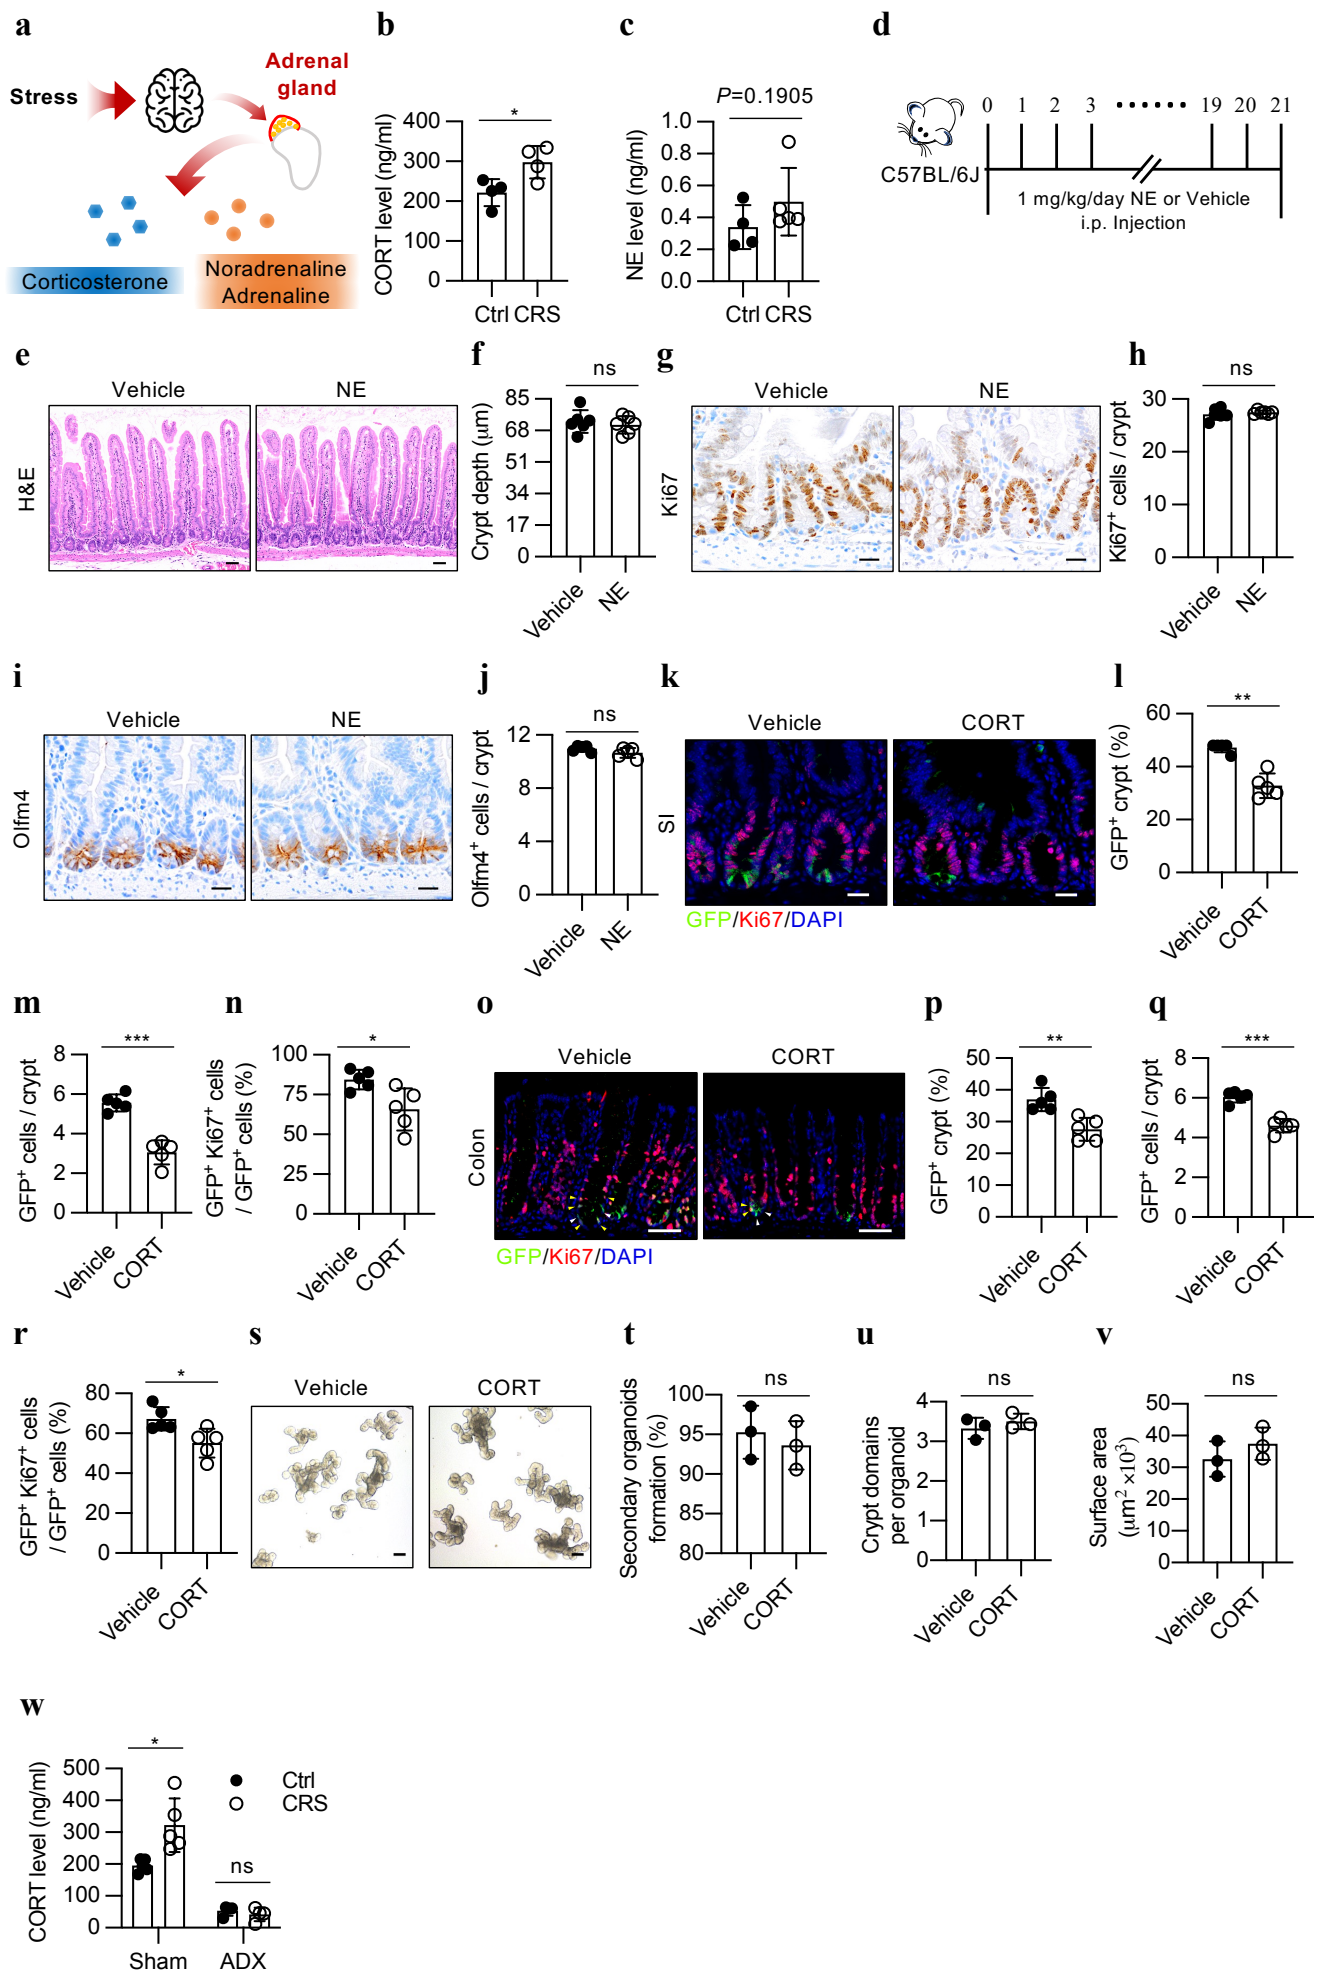



**Supplementary Fig. S5 Corticosterone rather than noradrenaline drives the impairment of ISCs.**

**a** Schematic of Corticosterone, Noradrenaline and Adrenaline triggered by stress. **b** Plasma levels of CORT in control (Ctrl) mice and mice subjected to 3 hours of restraint stress (n=4). **c** Plasma levels of NE in Ctrl mice and mice subjected to 3 hours of restraint stress (n=3). NE, noradrenaline. **d** Schematic representation of NE administration to C57BL/6J mice. WT mice were intraperitoneally injected with NE or vehicle (1 mg/kg BW/day) for 3 weeks. **e, f** H&E staining (**e**) and quantification of crypt depth (**f**) in the jejunum of vehicle- and NE-treated mice (n=6). Scale bar: 50  $\mu$ m. **g, h** Ki-67 staining (**g**) and quantification of Ki67<sup>+</sup> cells per crypt (**h**) in the jejunum of vehicle- and NE-treated mice (n=6). Scale bar: 20  $\mu$ m. **i, j** Olfm4 staining (**i**) and quantification of Olfm4<sup>+</sup> cells per crypt (**j**) in the jejunum of vehicle- and NE-treated mice (n=5). Scale bar: 20  $\mu$ m. **k** Lgr5<sup>+</sup> stem cells were identified with anti-GFP, and their proliferative state was visualized using Ki-67 staining in the jejunum of the vehicle- and CORT-treated (5 mg/kg BW/day) *Lgr5-EGFP-IRES-creERT2* mice. SI, small intestine. Scale bar: 20  $\mu$ m. **l-n** Quantification of the percentage of GFP<sup>+</sup> crypt (**l**), GFP<sup>+</sup> cells per crypt (**m**), and the proportion of GFP<sup>+</sup> cells expressing Ki-67 (**n**) in the jejunum of vehicle- and CORT-treated *Lgr5-EGFP-IRES-creERT2* mice (n=5). **o** Lgr5<sup>+</sup> stem cells were identified with anti-GFP, and their proliferative state was visualized using Ki-67 staining in the colon of vehicle- and CORT-treated *Lgr5-EGFP-IRES-creERT2* mice. Scale bar: 50  $\mu$ m. **p-r** Quantification of percentage of GFP<sup>+</sup> crypt (**p**), GFP<sup>+</sup> cells per crypt (**q**), and the proportion of GFP<sup>+</sup> cells expressing Ki-67 (**r**) in the colon of vehicle-

and CORT-treated *Lgr5-EGFP-IRES-creERT2* mice (n=5). **s–v** Representative images of day 3 secondary organoids generated from dissociated crypt-derived primary organoids from the vehicle- and CORT-treated groups (**s**) and quantification of secondary organoid formation (**t**), bud number (**u**) and surface area (**v**) (n=3). Scale bar: 100  $\mu$ m. **w** Plasma levels of CORT in Sham and ADX mice with or without restraint stress treatment (n=4-5). The data are presented as the mean  $\pm$  SD. The statistical analysis was performed by an unpaired two-tailed Student's *t* test for normally distributed data or the Mann–Whitney test for non-normally distributed data. ns,  $P \geq 0.05$ , \* $P < 0.05$ , \*\* $P < 0.01$ , \*\*\* $P < 0.001$ .

# Supplementary Fig. S6

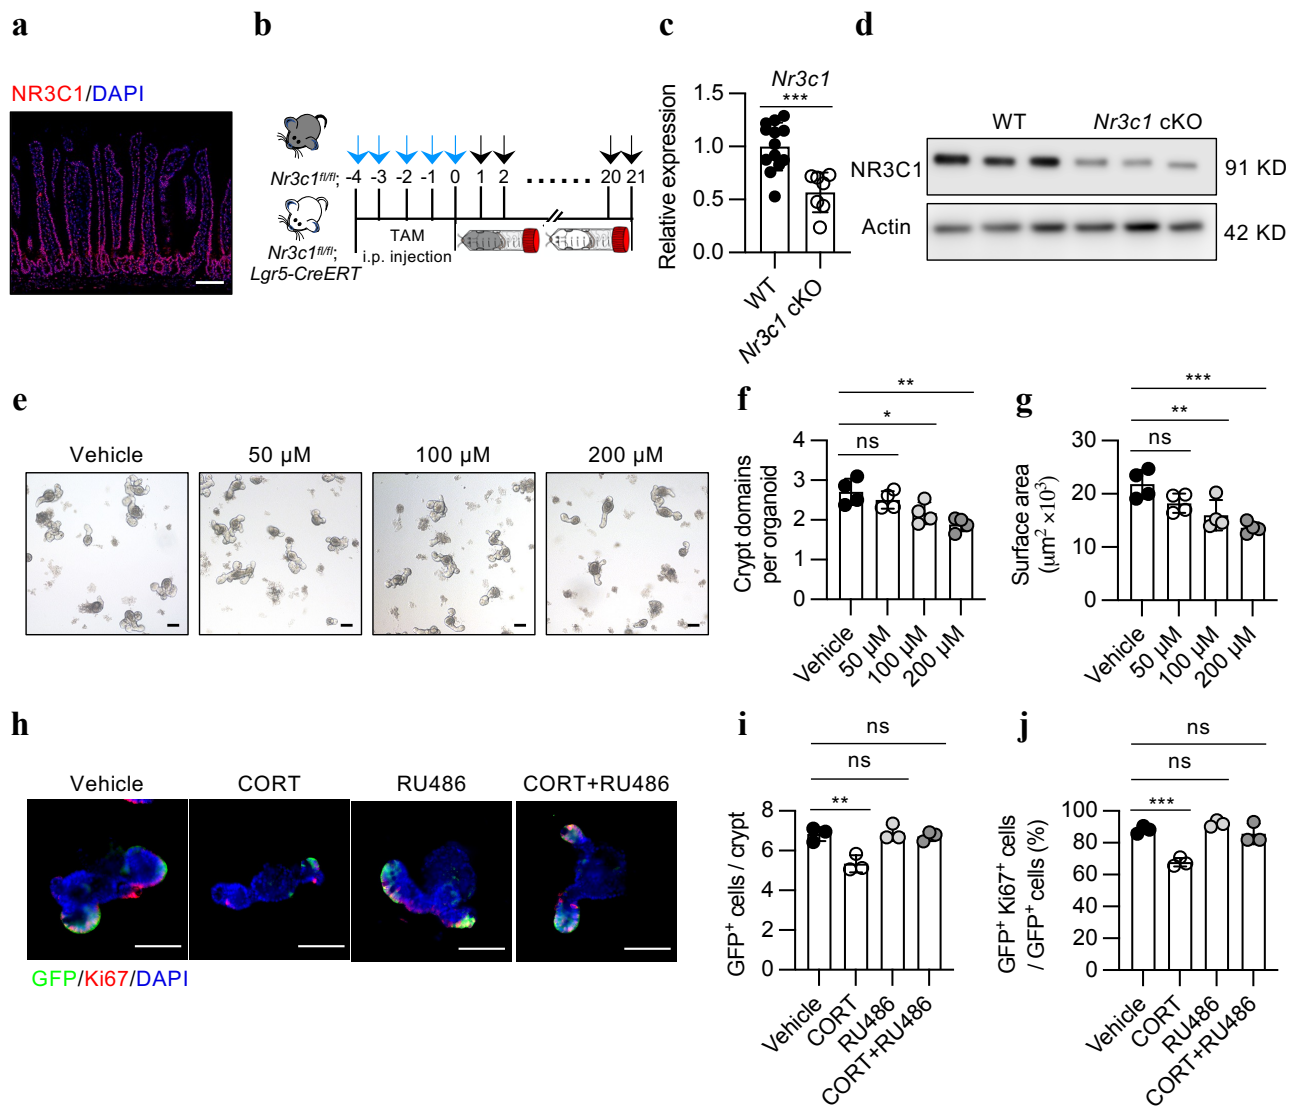

**Supplementary Fig. S6 Corticosterone directly impedes ISC via NR3C1.**

**a** Immunofluorescence staining of NR3C1 in the small intestine of the WT mice. Scale bar: 100  $\mu$ m. **b** Schematic diagram of CRS treatment in WT and *Nr3c1* cKO mice. After 5 days of tamoxifen (TAM, 2 mg/25 g BW/day) injection, a portion of WT and *Nr3c1* cKO mice were subjected to CRS treatment for 3 weeks. **c** RT-qPCR was used to detect *Nr3c1* expression in small intestinal crypts from WT (n=13) and *Nr3c1* cKO (n=7) mice. **d** Western blotting for NR3C1 expression in small intestinal crypts from WT and *Nr3c1* cKO mice. **e** Representative images of day 4 organoids after *ex vivo* treatment with different concentrations of CORT. Scale bar: 100  $\mu$ m. **f, g** Quantification of the bud number (**f**) and surface area (**g**) of the organoids (n=4). **h** Representative immunofluorescence images of day 4 organoids from small intestine of *Lgr5-EGFP-IRES-creERT2* mice after *ex vivo* treatment with 200  $\mu$ M CORT, 5  $\mu$ M RU486 or 200  $\mu$ M CORT simultaneously supplemented with 5  $\mu$ M RU486. *Lgr5*<sup>+</sup> stem cells were identified with anti-GFP, and their proliferative state was visualized by Ki-67 staining. Scale bar: 100  $\mu$ m. **i, j** Quantification of GFP<sup>+</sup> cells per crypt (**i**), and the proportion of GFP<sup>+</sup> cells expressing Ki-67 (**j**) in organoids after *ex vivo* treatment with 200  $\mu$ M CORT, 5  $\mu$ M RU486 or 200  $\mu$ M CORT simultaneously supplemented with 5  $\mu$ M RU486 (n=3). The data are presented as the mean  $\pm$  SD. Statistical analysis was performed by one-way ANOVA with Dunnett's multiple comparisons test for normally distributed data or Kruskal-Wallis test with Dunn's multiple comparisons test for non-normally distributed data. ns,  $P \geq 0.05$ , \* $P < 0.05$ , \*\* $P < 0.01$ , \*\*\* $P < 0.001$ .

Supplementary Fig. S7

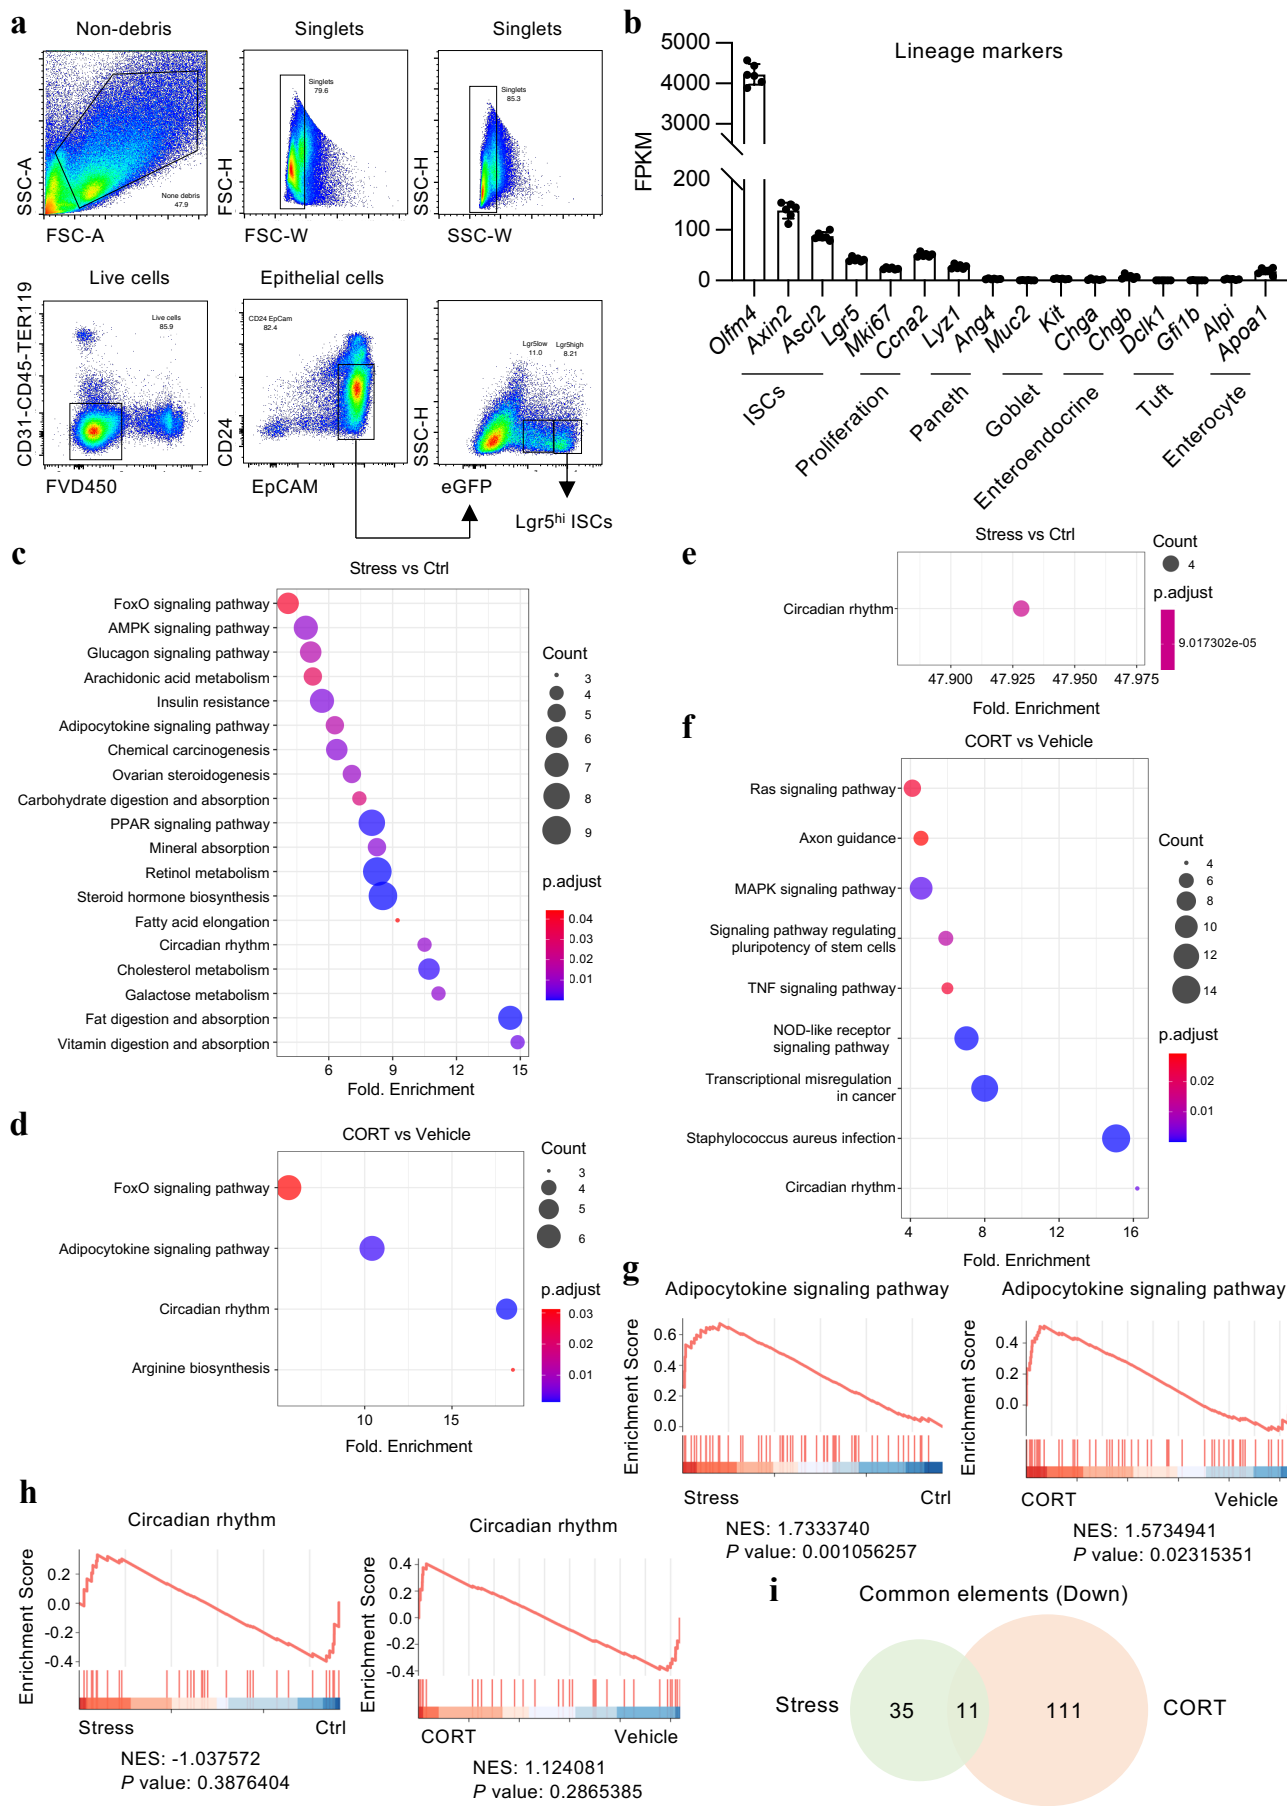

**Supplementary Fig. S7 Differential gene expression in ISCs from stress- and corticosterone-treated mice.**

**a** Gating strategy for FACS analysis to isolate Lgr5-EGFP<sup>high</sup> ISCs from the small intestine of *Lgr5-EGFP-IRES-creERT2* mice for RNA-seq (n=3). **b** Expression levels of different cell type-specific signature genes in FACS-purified Lgr5-EGFP<sup>high</sup> ISCs. Data are shown as FPKM (fragments per kilobase million). **c, d** KEGG analysis of upregulated genes in ISCs from **(c)** 1-day restraint stress-treated mice (versus Ctrl) and **(d)** 1-day CORT-treated mice (versus vehicle). **e, f** KEGG analysis of downregulated genes in ISCs from **(e)** 1-day restraint stress-treated mice (versus Ctrl) and **(f)** 1-day CORT-treated mice (versus vehicle). **g, h** GSEA of transcriptome profiles showing the enrichment of **(g)** the adipocytokines and **(h)** the circadian rhythm signaling pathway in ISCs from 1-day restraint stress-treated mice (versus Ctrl) and 1-day CORT-treated mice (versus vehicle). **i** Venn diagram showing overlapping downregulated genes in ISCs from 2-day restraint stress-treated mice (versus Ctrl) and 1-day CORT-treated mice (versus vehicle).

Supplementary Fig. S8

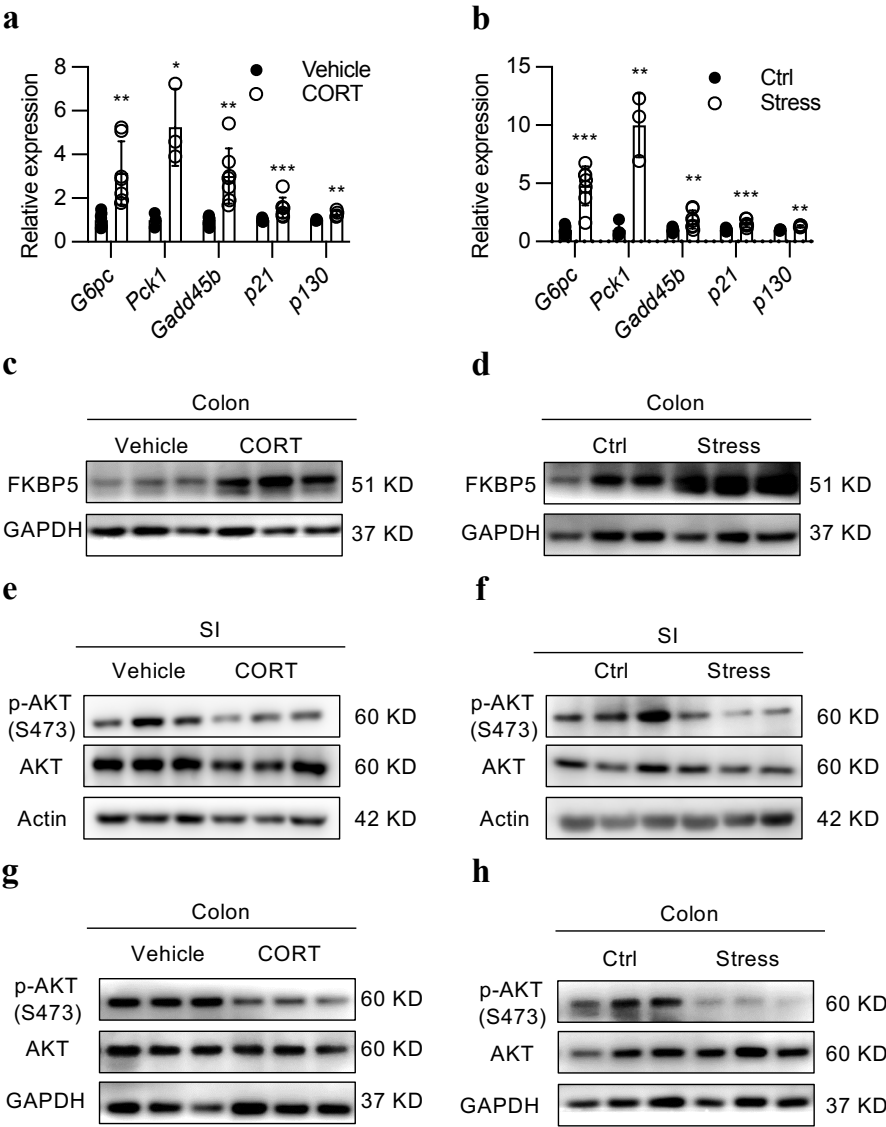



**Supplementary Fig. S8 Corticosterone negatively regulates the activation of AKT.**

**a, b** RT-qPCR analysis of gene expression in the small intestinal crypts from 1-day CORT- (**a**) and 1-day stress-treated (**b**) mice (n=3-7). **c, d** Western blotting for FKBP5 in the colonic crypts of vehicle- and 2-day CORT-treated mice (**c**) and in the colonic crypts of Ctrl and 2-day restraint stress-treated mice (**d**); GAPDH was used as a loading control. **e, f** Western blotting for AKT and pAKT (S473) in the small intestinal crypts of vehicle- and 2-day CORT-treated mice (**e**) and in the small intestinal crypts of Ctrl and 2-day restraint stress-treated mice (**f**);  $\beta$ -actin was used as a loading control. SI, small intestine. **g, h** Western blotting for AKT and pAKT (S473) in the colonic crypts of vehicle- and 2-day CORT-treated mice (**g**) and in the colonic crypts of Ctrl and 2-day restraint stress-treated mice (**h**); GAPDH was used as a loading control. The data are presented as the mean  $\pm$  SD. The statistical analysis was performed by an unpaired two-tailed Student's *t* test for normally distributed data or the Mann-Whitney test for non-normally distributed data. \**P* < 0.05, \*\**P* < 0.01, \*\*\**P* < 0.001.

## Supplementary Fig. S9

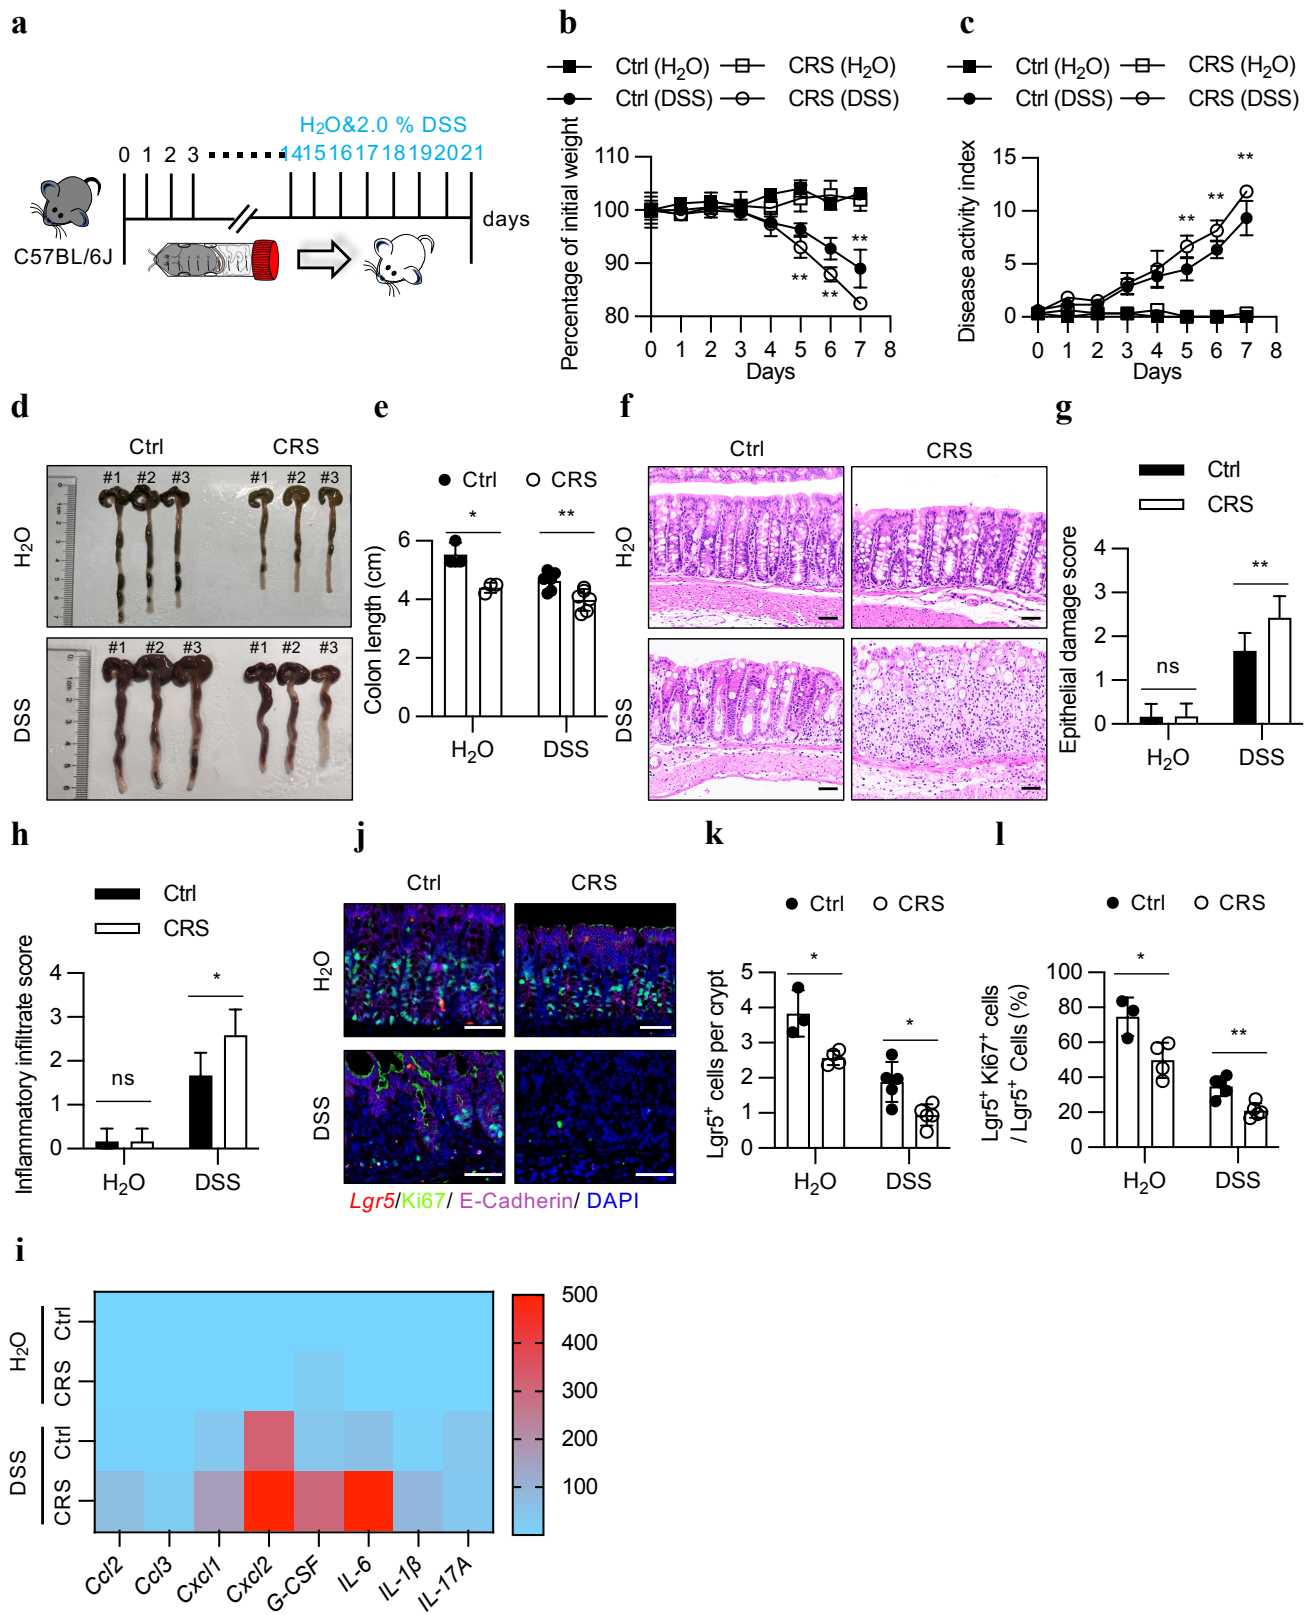

**Supplementary Fig. S9 Chronic stress increases the susceptibility to developing colitis.**

**a** Schematic of the dextran sulfate sodium (DSS)-induced colitis model. Water or 2.0 % DSS drinking water was administered during the last week of the three-week CRS treatment. **b, c** Body weight (**b**) and disease activity index (DAI) (**c**) of control (Ctrl) and stress-treated (CRS) mice with (n=6) or without (n=3) 2.0% DSS treatment. Body weight was monitored daily and expressed as a percentage of the initial body weight. **d, e** Representative image of the colon (**d**) and colon length (**e**) of Ctrl and CRS-treated mice with (n=6) or without (n=3) 2.0% DSS treatment. **f–h** Representative HE staining image (**f**), epithelial damage score (**g**), and inflammatory infiltrate score (**h**) of colonic sections from Ctrl and CRS-treated mice with (n=6) or without (n=3) 2.0% DSS treatment. Scale bar: 50  $\mu$ m. **i** RT–qPCR analysis of cytokine genes in colonic tissue from H<sub>2</sub>O+Ctrl(n=3), H<sub>2</sub>O+CRS(n=4), DSS+Ctrl (n=6), DSS+CRS (n=8) mice on day 7 during DSS treatment. **j** Representative image of *in situ* hybridization for Lgr5 together with immunofluorescence for Ki-67 and the epithelial marker cadherin (E-cadherin) in the colon of Ctrl and CRS-treated mice with (n=6) or without (n=3) 2.0% DSS treatment. Scale bar: 50  $\mu$ m. **k–l** Quantification of percentage of Lgr5<sup>+</sup> cells per crypt (**k**), and the proportion of Lgr5<sup>+</sup> cells expressing Ki-67 (**l**) in the colon of Ctrl and CRS-treated mice with (n=5) or without (n=3-4) 2.0% DSS treatment. The data are presented as the mean  $\pm$  SD. The statistical analysis was performed by an unpaired two-tailed Student's *t* test for normally distributed data or the Mann–Whitney test for non-normally distributed data. ns,  $P \geq 0.05$ , \* $P < 0.05$ , \*\* $P < 0.01$ .

Supplementary Fig. S10

**a**

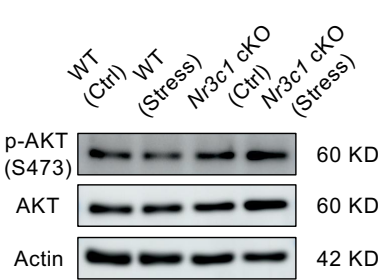

**b**

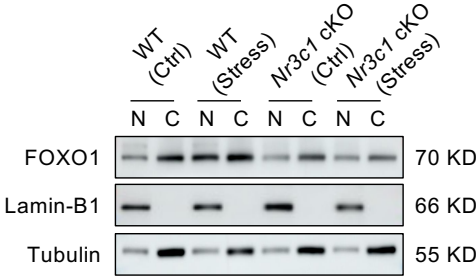

**Supplementary Fig. S10 *Nr3c1* deficiency in ISC restores AKT activation inhibited by stress.**

**a** Western blotting for AKT and pAKT (S473) in the small intestinal crypts of Ctrl or 2-day restraint stress-treated WT (*Nr3c1<sup>fl/fl</sup>*) and *Nr3c1* cKO (*Lgr5;Nr3c1<sup>fl/fl</sup>*) mice;  $\beta$ -actin was used as a loading control. **b** Western blotting for FOXO1 in nuclear and cytoplasmic proteins isolated from the small intestinal crypts of the Ctrl or 2-day restraint stress-treated WT (*Nr3c1<sup>fl/fl</sup>*) and *Nr3c1* cKO (*Lgr5;Nr3c1<sup>fl/fl</sup>*) mice; Lamin B1 and tubulin were used as nuclear proteins and cytoplasmic proteins loading controls, respectively.

Graphic abstract

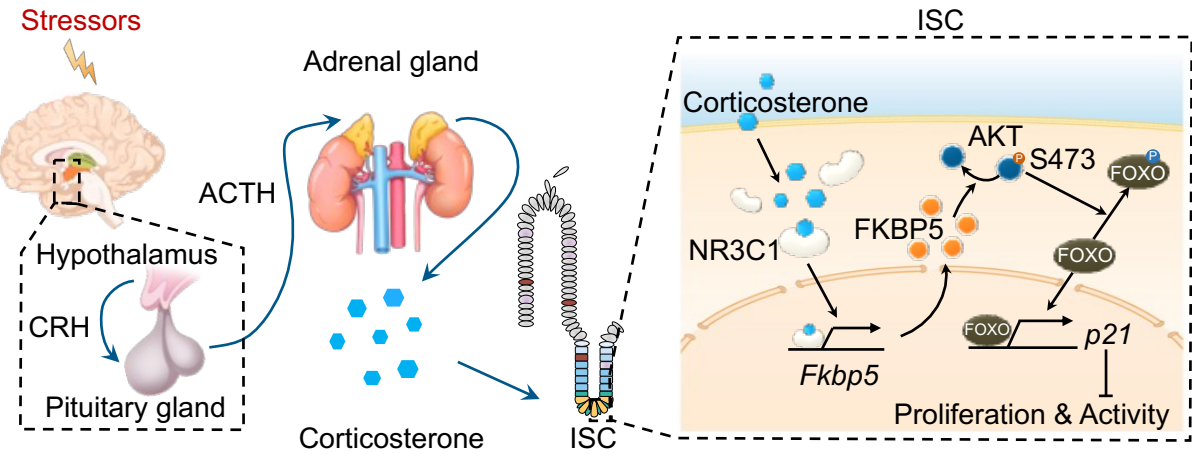

**Supplementary Table S1 Genotyping primers**

| Primer name                                                         | Sequence (5' to 3')   |
|---------------------------------------------------------------------|-----------------------|
| <i>Nr3c1</i> <sup>fl/fl</sup> -F                                    | GCTGCTGCACGGACTGG     |
| <i>Nr3c1</i> <sup>fl/fl</sup> -R                                    | CGGCTGCTCTGGAATGTGA   |
| <i>Lgr5</i> <sup>tm1<sup>(cre/ERT2)</sup></sup> - Common            | CTGCTCTCTGCTCCCAGT CT |
| <i>Lgr5</i> <sup>tm1<sup>(cre/ERT2)</sup></sup> - Mutant Reverse    | CTGAACTTGTGGCCGTTTAC  |
| <i>Lgr5</i> <sup>tm1<sup>(cre/ERT2)</sup></sup> - Wild type Reverse | GTCTGGTCAGAATGCCCTTG  |



**Supplementary Table S2 ChIP-qPCR primers**

| <b>Primer name</b>           | <b>Sequence (5' to 3')</b>  |
|------------------------------|-----------------------------|
| <i>ChIP-Fkbp5 promotor-F</i> | <i>TTTGCATCTCCGCCTCTTCA</i> |
| <i>ChIP-Fkbp5 promotor-R</i> | <i>TCCTCCATCCCTCTTCTCCG</i> |
| <i>ChIP-negative ctrl-F</i>  | <i>GCCAAGTTCAGCTGTGCAAT</i> |
| <i>ChIP-negative ctrl-R</i>  | <i>TGCCAGCCACATTCAGAACA</i> |

**Supplementary Table S3 RT-qPCR primers**

| <b>Primer name</b>     | <b>Sequence (5' to 3')</b>      |
|------------------------|---------------------------------|
| <i>m-Nr3c1-F</i>       | <i>TCAGCAGCAGGATCAGAAGC</i>     |
| <i>m-Nr3c1-R</i>       | <i>TGGACGGAGGAGAACTCACA</i>     |
| <i>m-Fkbp5-F</i>       | <i>TGAGGGCACCAGTAACAATGG</i>    |
| <i>m-Fkbp5-R</i>       | <i>CAACATCCCTTTGTAGTGGACAT</i>  |
| <i>m-Cdkn1a(p21)-F</i> | <i>CCTGGTGATGTCCGACCTG</i>      |
| <i>m-Cdkn1a(p21)-R</i> | <i>CCATGAGCGCATCGCAATC</i>      |
| <i>m-Ccnd1-F</i>       | <i>GCGTACCCTGACACCAATCTC</i>    |
| <i>m-Ccnd1-R</i>       | <i>CTCCTCTTCGCACTTCTGCTC</i>    |
| <i>m-Rbl2(p130)-F</i>  | <i>TCCTTACACGACGGTCTAGTG</i>    |
| <i>m-Rbl2(p130)-R</i>  | <i>TCCCAGCGGGTAACACGTA</i>      |
| <i>m-Gadd45b-F</i>     | <i>CAACGCGGTTCAGAAGATGC</i>     |
| <i>m-Gadd45b-R</i>     | <i>GGTCCACATTCATCAGTTTGGC</i>   |
| <i>m-Ccl2-F</i>        | <i>AACTCTCACTGAAGCCAGCTCT</i>   |
| <i>m-Ccl2-R</i>        | <i>CGTTAACTGCATCTGGCTGA</i>     |
| <i>m-Ccl3-F</i>        | <i>TGAAACCAGCAGCCTTTGCTC</i>    |
| <i>m-Ccl3-R</i>        | <i>AGGCATTCAAGTTCCAGGTCAGTG</i> |
| <i>m-Cxcl1-F</i>       | <i>CAATGAGCTGCGCTGTCAGTG</i>    |
| <i>m-Cxcl1-R</i>       | <i>CTTGGGGACACCTTTTAGCATC</i>   |
| <i>m-Cxcl2-F</i>       | <i>CCTGGTTCAGAAAATCATCCA</i>    |
| <i>m-Cxcl2-R</i>       | <i>CTTCCGTTGAGGGACAGC</i>       |
| <i>m-G-CSF-F</i>       | <i>ATGGCTCAACTTTCTGCCCAG</i>    |
| <i>m-G-CSF-R</i>       | <i>CTGACAGTGACCAGGGGAAC</i>     |

| <i>Primer name</i>                | <i>Sequence (5' to 3')</i>  |
|-----------------------------------|-----------------------------|
| <i>m-IL-6-F</i>                   | <i>CACGGCCTTCCCTACTTCAC</i> |
| <i>m-IL-6-R</i>                   | <i>TGCAAGTGCATCATCGTTGT</i> |
| <i>m-IL-1<math>\beta</math>-F</i> | <i>TGTGGCTGTGGAGAAGCTGT</i> |
| <i>m-IL-1<math>\beta</math>-R</i> | <i>CAGCTCATATGGGTCCGAGA</i> |
| <i>m-IL-17A-F</i>                 | <i>GCTCCAGAAGGCCCTCAG</i>   |
| <i>m-IL-17A-R</i>                 | <i>CTTCCCTCCGCATTGACA</i>   |
| <i>m-Actb-F</i>                   | <i>GAGCGCAAGTACTCTGTGTG</i> |
| <i>m-Actb-R</i>                   | <i>CGGACTCATCGTACTCCTG</i>  |
